# Supplementary material for: Rheumatoid arthritis-relevant DNA methylation changes identified in ACPA-positive asymptomatic individuals using methylome capture sequencing
Source: PubMed Central journal article supplement (PMC6668183; doi:10.1186/s13148-019-0699-9), 2019-07-31

**CpG methylation level distribution**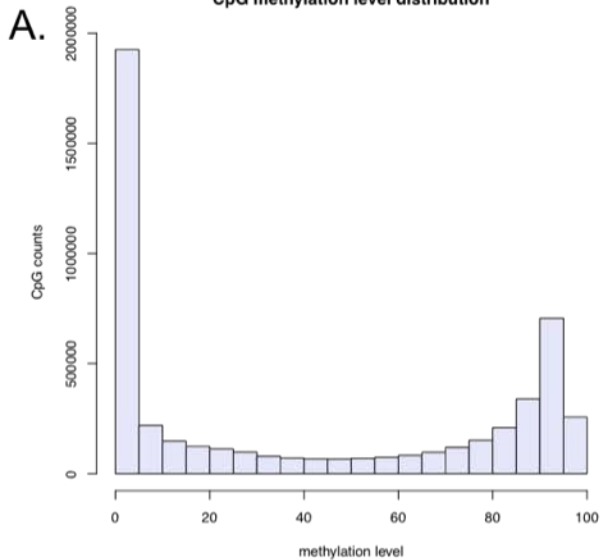**CpG read coverage distribution**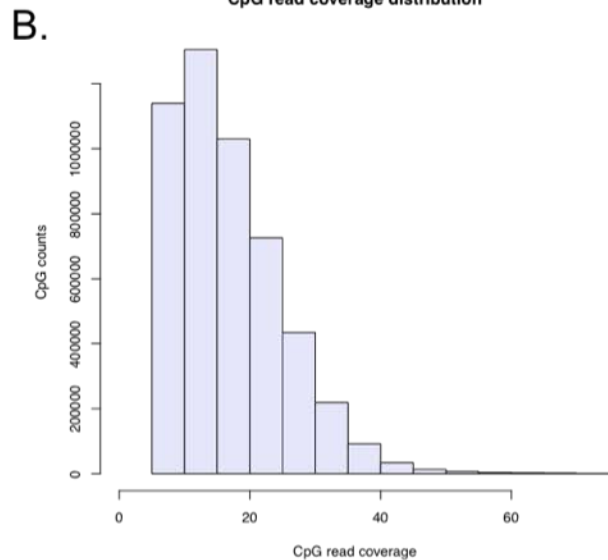**Sample coverage per CpG**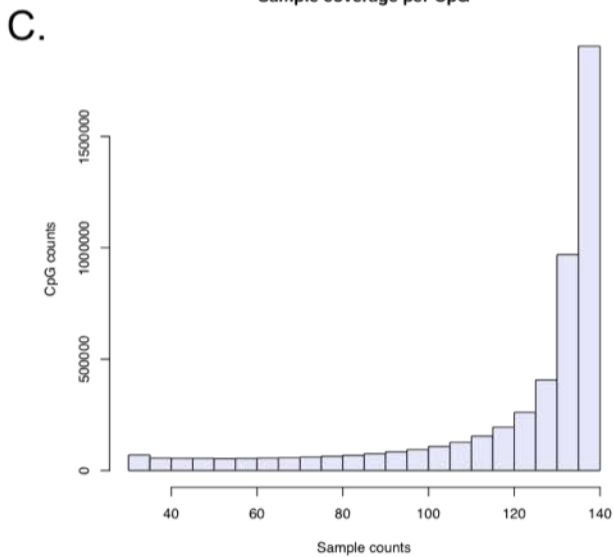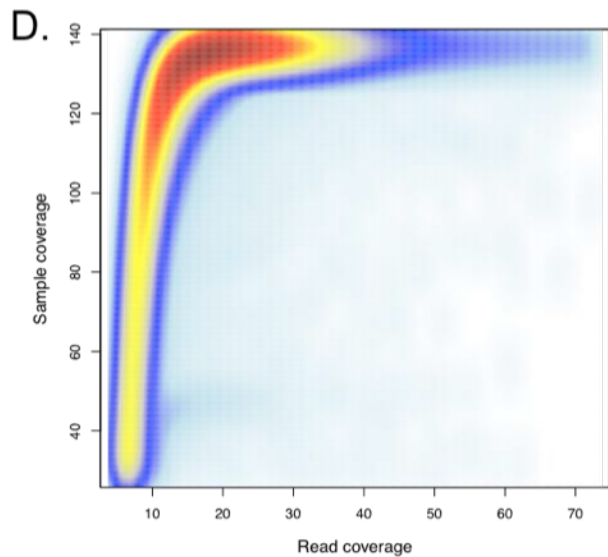

Supplement: 13148_2019_699_MOESM3_ESM.pdf [file 13148_2019_699_MOESM3_ESM.pdf]
